# Supplementary material for: Pyridine-functionalized organic porous polymers: applications in efficient CO2 adsorption and conversion
Source: Royal Society of Chemistry journal article supplement (doi:10.1039/c6nj03899a), 2017-01-01

## Electronic Supplementary Information

### Pyridine-functionalized organic porous polymers: applications in efficient CO<sub>2</sub> adsorption and conversion

Zhenzhen Yang,<sup>a</sup> Huan Wang,<sup>a,b</sup> Guiping Ji,<sup>a,b</sup> Xiaoxiao Yu<sup>a,b</sup>, Yu Chen,<sup>a,b</sup> Xinwei Liu,<sup>a,b</sup> Cailing Wu,<sup>a,b</sup>  
and Zhimin Liu\*<sup>a,b</sup>

<sup>a</sup> Beijing National Laboratory for Molecular Sciences, Key Laboratory of Colloid, Interface and Thermodynamics, Institute of Chemistry, Chinese Academy of Sciences, Beijing 100190, China. E-mail: liuzm@iccas.ac.cn.

<sup>b</sup> University of Chinese Academy of Sciences, Beijing 100049, China

### Table of contents

|                                                 |   |
|-------------------------------------------------|---|
| 1. General experimental methods .....           | 2 |
| 2. Synthetic procedures .....                   | 2 |
| Table S1 .....                                  | 3 |
| Figure S1.....                                  | 4 |
| Figure S2.....                                  | 5 |
| Figure S3.....                                  | 5 |
| Figure S4.....                                  | 6 |
| Figure S5.....                                  | 7 |
| 3. NMR characterization of the formamides ..... | 7 |

## 1. General experimental methods

### Materials

All reagents and solvents were purchased from commercial sources and were used without further purification, unless indicated otherwise. 2,6-di(9H-carbazol-9-yl)pyridine (**CarPy**), **CarPy-CMP** were prepared following procedures reported in the literature (Chem. Commun. 2016, 10.1039/C1036CC09374D.). Preparation of **CarPy-CMP@Ru** was shown below. Ru/C (5 wt%) was purchased from Shanxi Rock New Materials Co. Ltd.

### Instrumentation

Liquid  $^1\text{H}$  NMR spectra was recorded in  $\text{CDCl}_3$  using the residual  $\text{CHCl}_3$  as internal reference (7.26 ppm) on Bruker 400 spectrometer. Liquid  $^{13}\text{C}$  NMR was recorded at 100.6 MHz in  $\text{CDCl}_3$  using the residual  $\text{CHCl}_3$  as internal reference (77.0 ppm). Gas sorption isotherms were obtained with Micromeritics TriStar II 3020 and Micromeritics ASAP 2020 M+C accelerated surface area and porosimetry analyzers at certain temperature. The samples were outgassed at 120 °C for 8 h before the measurements. Surface areas were calculated from the adsorption data using Brunauer-Emmett-Teller (BET) methods. The pore-size-distribution curves were obtained from the adsorption branches using non-local density functional theory (NLDFT) method. (HR) Transmission electron microscopy (TEM) images were obtained with a JEOL JEM-1011 and JEM-2011F instrument operated at 200 kV. X-ray photoelectron spectroscopy (XPS) was performed on an ESCALAB 220i-XL spectrometer at a pressure of  $\sim 3 \times 10^{-9}$  mbar (1 mbar = 100 Pa) using Al K $\alpha$  as the excitation source (1486.6 eV) and operated at 15 kV and 20 mA. The binding energies were referenced to the C $_{1s}$  line at 284.8 eV from adventitious carbon. The content of Fe or Ru was determined by ICP-AES (VISTA-MPX). The reaction mixture was analyzed by means of GC (Agilent 4890D) with a FID detector and a nonpolar capillary column (DB-5) (30 m  $\times$  0.25 mm  $\times$  0.25  $\mu\text{m}$ ). The column oven was temperature-programmed with a 2 min initial hold at 323 K, followed by the temperature increase to 538 K at a rate of 20 K/min and kept at 538 K for 10 min. High purity nitrogen was used as a carrier gas.

## 2. Synthetic procedures

### (1) Synthesis of **Car-CMP-1@Ru**

Ref.: *Angew. Chem. Int. Ed.* 2014, **53**, 8645-8648.

Take the synthesis of **Car-CMP-1@Ru** as a typical example: 100 mg of **Car-CMP-1** were initially dispersed in 100 mL EtOH solution of  $\text{RuCl}_3 \cdot 3\text{H}_2\text{O}$  (6.5 mg) to form a uniform suspension via tip sonication (500 W, 20 kHz, 38% amplitude power output) for 4 min and then stir for 2 h at room temperature. The mixture was dried under vacuum at 60 °C for 2 h, then put into a quartz tube and heated to 300 °C under  $\text{H}_2$  atmosphere and maintained for 2 h.

### (2) Typical procedures for the formylation of morpholine

For a typical procedure, in a glovebox, **Car-CMP-1@Ru** (20 mg), morpholine (1 mmol) and MeOH (3 mL) was added successively into a stainless steel autoclave with a Teflon tube (25 mL

inner volume). CO<sub>2</sub> (4 MPa) and then H<sub>2</sub> was charged in the reactor until the total pressure reached 8 MPa at room temperature. The autoclave was stirred at 130 °C for 24 h. After reaction, the autoclave was cooling to 0 °C then the excess of gas was vented slowly. Dodecane (internal standard) and CH<sub>2</sub>Cl<sub>2</sub> (5 mL) was added, stirred vigorously and centrifuged. The upper liquid was analyzed by GC. For catalyst recycling, the catalyst was recycled by filtration, washed with CH<sub>2</sub>Cl<sub>2</sub> and EtOH, and then dried under vacuum at 140 °C for 24 h, followed by being reused for the next run. For the substrate scope investigation, the products were isolated by column chromatography on silica gel (eluent: petroleum and dichloromethane) and identified by NMR spectra.

**Table S1.** CO<sub>2</sub> Adsorption capacities of CMPs derived from various carbazole monomers (273 K, 1 atm)

| Entry | Monomer    | BET surface areas/m <sup>2</sup> g <sup>-1</sup> | CO <sub>2</sub> capacity /mg g <sup>-1</sup> | Reference                                                                                                        |
|-------|------------|--------------------------------------------------|----------------------------------------------|------------------------------------------------------------------------------------------------------------------|
| 1     | <b>C1</b>  | 2220                                             | 212                                          | <i>J. Am. Chem. Soc.</i> <b>2012</b> , <i>134</i> , 6084.                                                        |
| 2     | <b>C2</b>  | 510                                              | 78                                           | <i>Small</i> <b>2014</b> , <i>10</i> , 308.                                                                      |
| 3     | <b>C3</b>  | 630                                              | 84                                           | <i>Small</i> <b>2014</b> , <i>10</i> , 308.                                                                      |
| 4     | <b>C4</b>  | 660                                              | 90                                           | <i>Small</i> <b>2014</b> , <i>10</i> , 308.                                                                      |
| 5     | <b>C5</b>  | 1050                                             | 118                                          | <i>Small</i> <b>2014</b> , <i>10</i> , 308.                                                                      |
| 6     | <b>C6</b>  | 980                                              | 115                                          | <i>Small</i> <b>2014</b> , <i>10</i> , 308.                                                                      |
| 7     | <b>C7</b>  | 1430                                             | 132                                          | <i>Small</i> <b>2014</b> , <i>10</i> , 308.                                                                      |
| 8     | <b>C8</b>  | 1610                                             | 165                                          | <i>Macromolecules</i> <b>2014</b> , <i>47</i> , 5926.                                                            |
| 9     | <b>C9</b>  | 2440                                             | 182                                          | <i>Macromolecules</i> <b>2014</b> , <i>47</i> , 5926.                                                            |
| 10    | <b>C10</b> | 1110                                             | 148                                          | <i>Macromolecules</i> <b>2014</b> , <i>47</i> , 5926.                                                            |
| 11    | <b>C11</b> | 1320                                             | 138                                          | <i>Polym. Chem.</i> <b>2014</b> , <i>5</i> , 3081.                                                               |
| 12    | <b>C12</b> | 1180                                             | 121                                          | <i>Polym. Chem.</i> <b>2014</b> , <i>5</i> , 3081.                                                               |
| 13    | <b>C13</b> | 611                                              | 89                                           | <i>J. Mater. Chem. A</i> <b>2014</b> , <i>2</i> , 1877.                                                          |
| 14    | <b>C14</b> | 1222                                             | 145                                          | <i>J. Mater. Chem. A</i> <b>2014</b> , <i>2</i> , 1877.                                                          |
| 15    | <b>C15</b> | 893                                              | 125                                          | <i>Chem.-Asian J.</i> <b>2016</b> , <i>11</i> , 294.                                                             |
| 16    | <b>C16</b> | 1109                                             | 160                                          | <i>Polymer</i> <b>2015</b> , <i>70</i> , 52.                                                                     |
| 17    | <b>C17</b> | 790                                              | 94                                           | <i>Polymer</i> <b>2015</b> , <i>70</i> , 52.                                                                     |
| 18    | <b>C18</b> | 780                                              | 103                                          | <i>Polym. Chem.</i> <b>2015</b> , <i>6</i> , 2478.                                                               |
| 19    | <b>C19</b> | 700                                              | 110                                          | <i>Polym. Chem.</i> <b>2015</b> , <i>6</i> , 2478.                                                               |
| 20    | <b>C20</b> | 1040                                             | 151                                          | <i>Polym. Chem.</i> <b>2015</b> , <i>6</i> , 2478.                                                               |
| 21    | <b>C21</b> | 1130                                             | 167                                          | <i>Polym. Chem.</i> <b>2015</b> , <i>6</i> , 2478.                                                               |
| 22    | <b>C22</b> | 840                                              | 162                                          | <i>J. Mater. Chem. A</i> <b>2014</b> , <i>2</i> , 13422.                                                         |
| 23    | <b>C23</b> | 982                                              | 106                                          | <i>J. Mater. Chem. A</i> <b>2014</b> , <i>2</i> , 7795.<br><i>Macromolecules</i> <b>2014</b> , <i>47</i> , 2875. |
| 24    | <b>C24</b> | 952                                              | 118                                          | <i>J. Mater. Chem. A</i> <b>2014</b> , <i>2</i> , 7795.                                                          |
| 25    | <b>C25</b> | 965                                              | 123                                          | <i>J. Mater. Chem. A</i> <b>2014</b> , <i>2</i> , 7795.                                                          |
| 26    | <b>C26</b> | 1187                                             | 132                                          | <i>J. Mater. Chem. A</i> <b>2014</b> , <i>2</i> , 7795.                                                          |
| 27    | <b>C27</b> | 1647                                             | 245                                          | <i>Chem. Commun.</i> <b>2016</b> , <i>52</i> , 4454.                                                             |

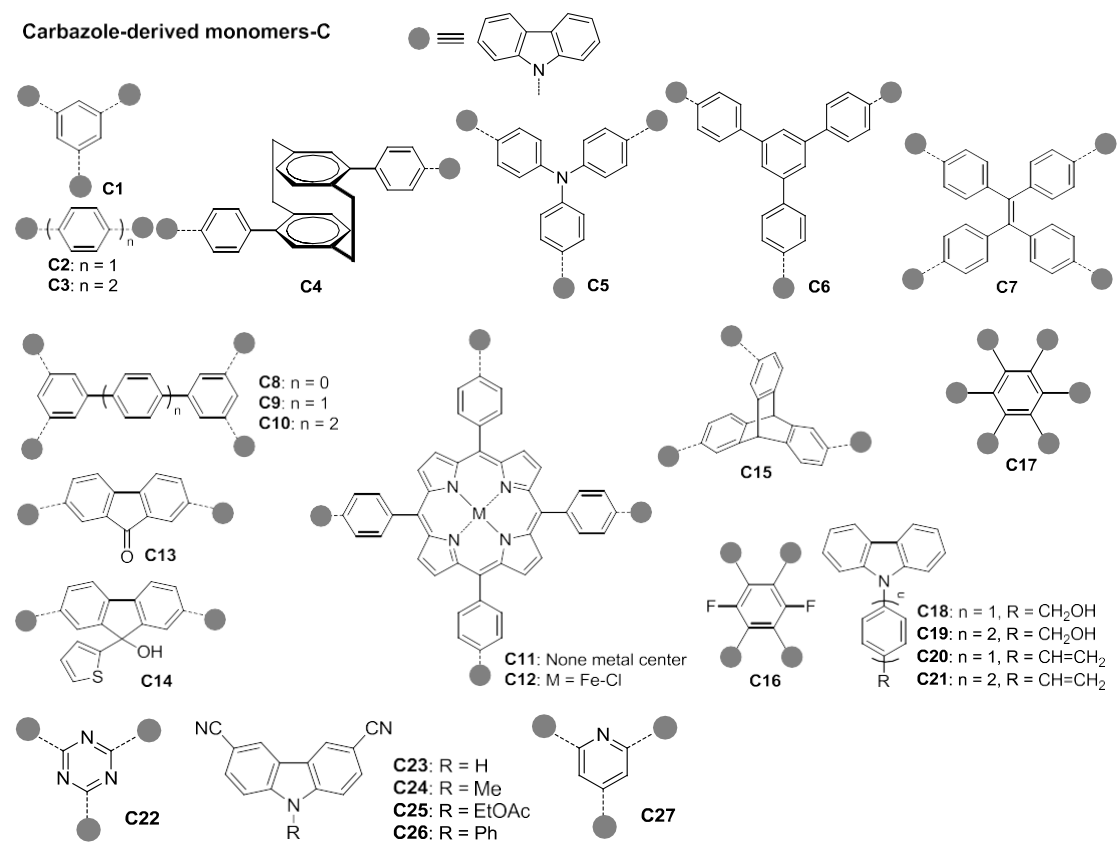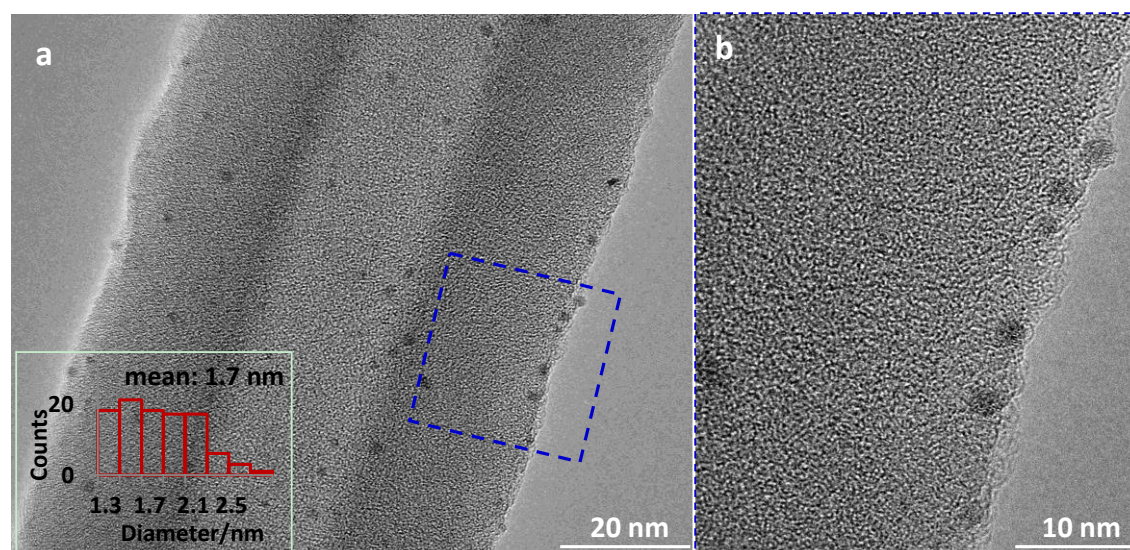

**Figure S1** (HR)TEM images of **CarPy-CMP@Ru**. Map of  $Ru^0$  particle sizes distribution was obtained by counting 100 particles. **b** was the magnified section within the blue dashed line square in **a**.

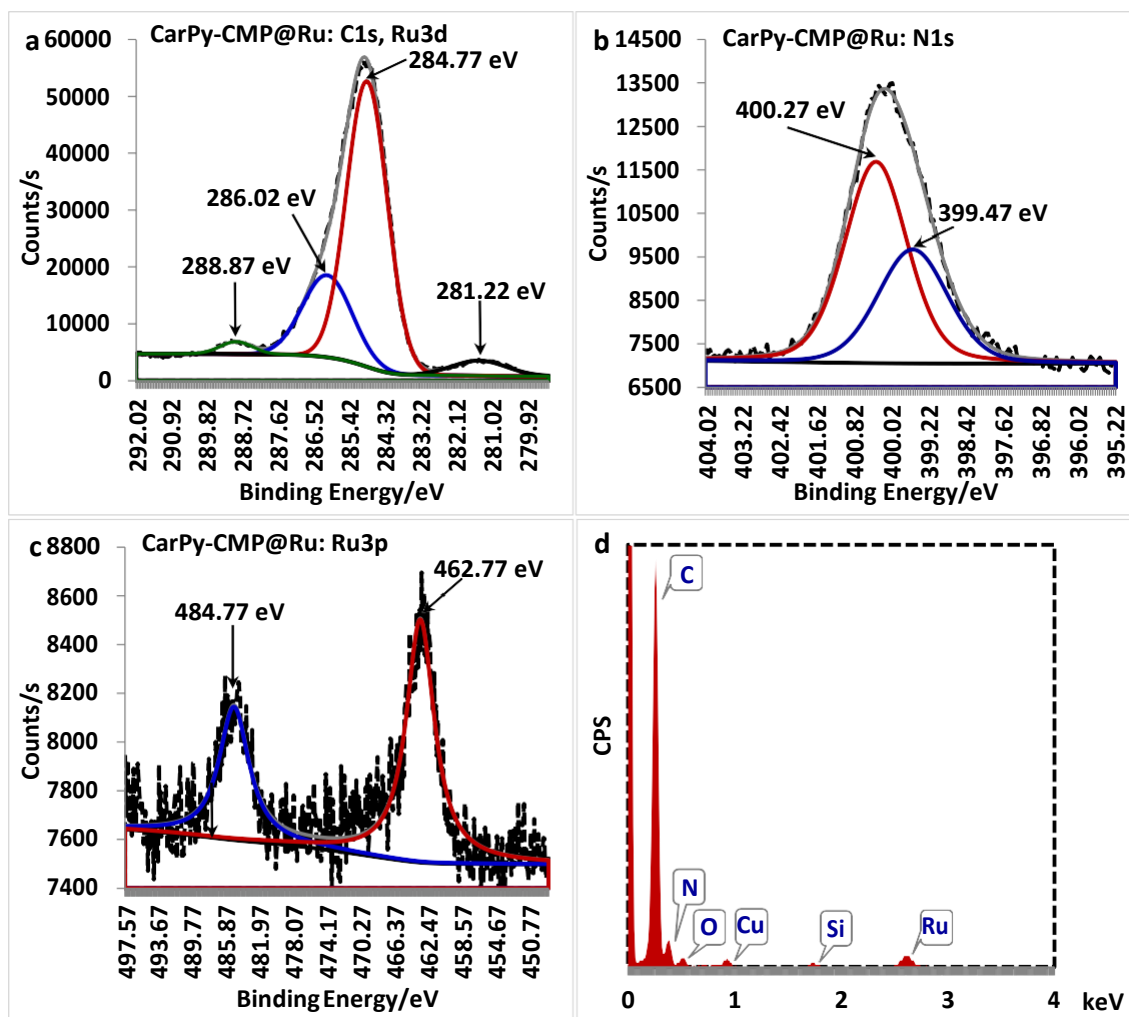

Figure S2 a, b, c) XPS spectra of C1s, N1s, Ru3d and Ru3p for CarPy-CMP@Ru. d) EDS profile of CarPy-CMP@Ru.

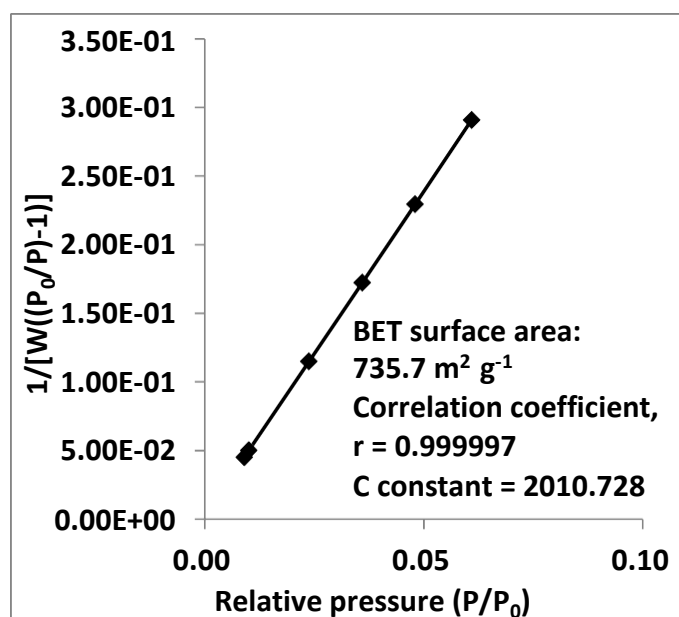

Figure S3 BET plot of CarPy-CMP@Ru.

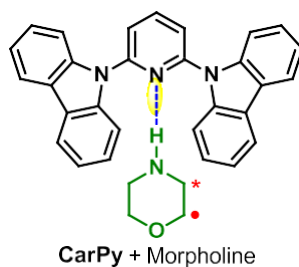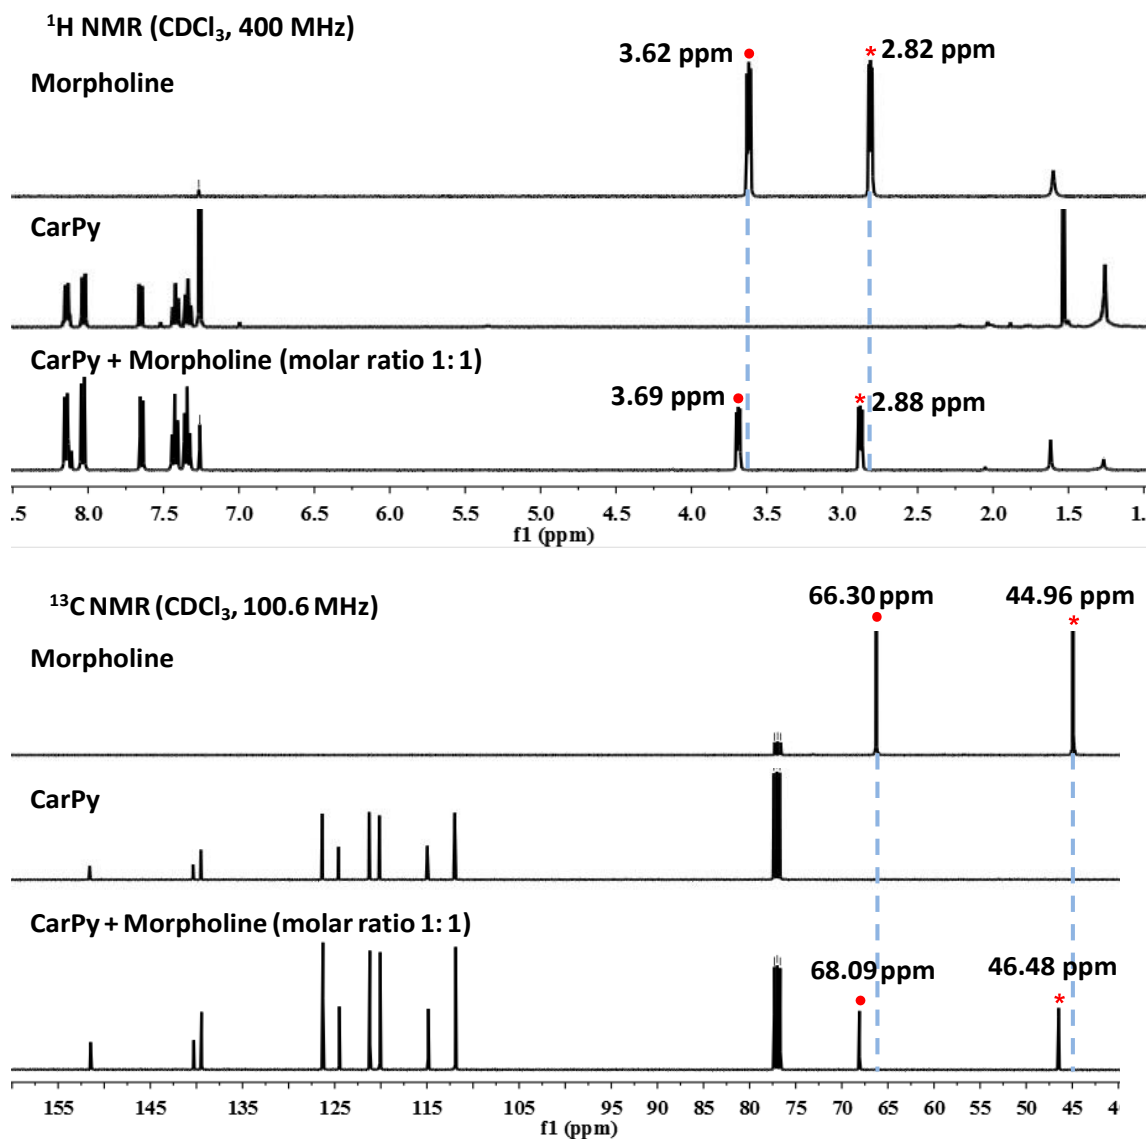

Figure S4 <sup>1</sup>H and <sup>13</sup>C NMR of morpholine and monomer CarPy, and their mixtures (molar ratio 1:1).

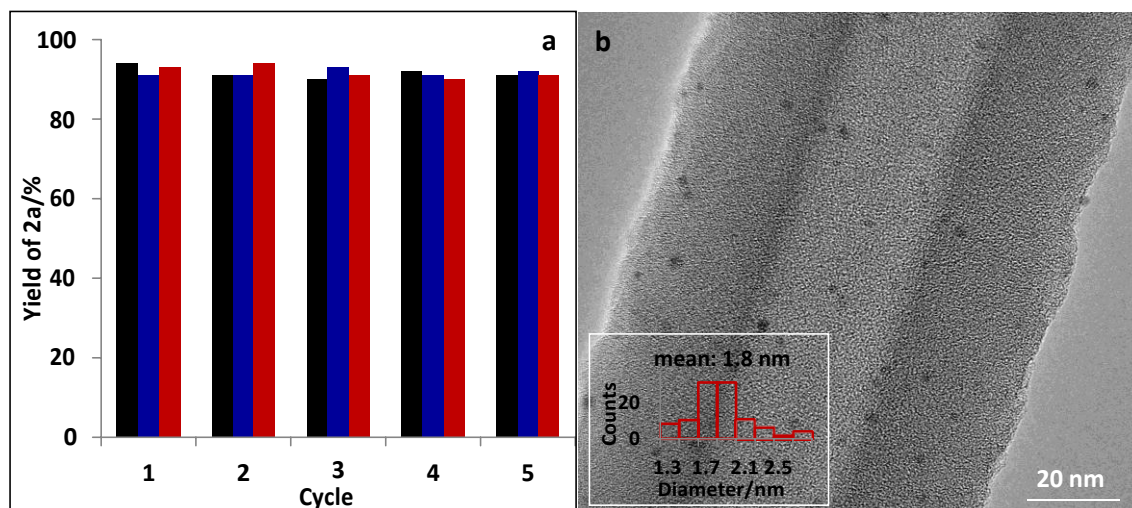

**Figure S5** a) Recyclability test of **Car-CMP-1@Ru** for formylation of morpholine (**1a**) with  $\text{CO}_2/\text{H}_2$ . Three parallel experiment has been done for each cycle. Reaction conditions: **1a** 1 mmol, catalyst loading 0.5 mol% Ru based on **1a**, MeOH 3 mL,  $\text{CO}_2$  pressure 4 MPa, total pressure ( $\text{CO}_2 + \text{H}_2$ ) 8 MPa, 130 °C, 24 h. The yield of morpholine-4-carbaldehyde (**2a**) was determined by GC using dodecane as an internal standard. b) TEM images of **Car-CMP-1@Ru**. Map of  $\text{Ru}^0$  particle sizes distribution was obtained by counting 100 particles.

### 3. NMR characterization of the formamides

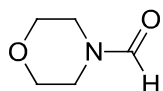

$^1\text{H}$  NMR ( $\text{CDCl}_3$ , 400 MHz)  $\delta$  3.17 (t,  $^3J = 5.2$  Hz, 2H), 3.31 (t,  $^3J = 5.2$  Hz, 2H), 3.41 (t,  $^3J = 4.4$  Hz, 2H), 3.45 (t,  $^3J = 4.4$  Hz, 2H), 7.81 (s, 1H);

$^{13}\text{C}$  NMR ( $\text{CDCl}_3$ , 100.6 MHz)  $\delta$  38.89, 44.11, 64.75, 65.68, 159.39.

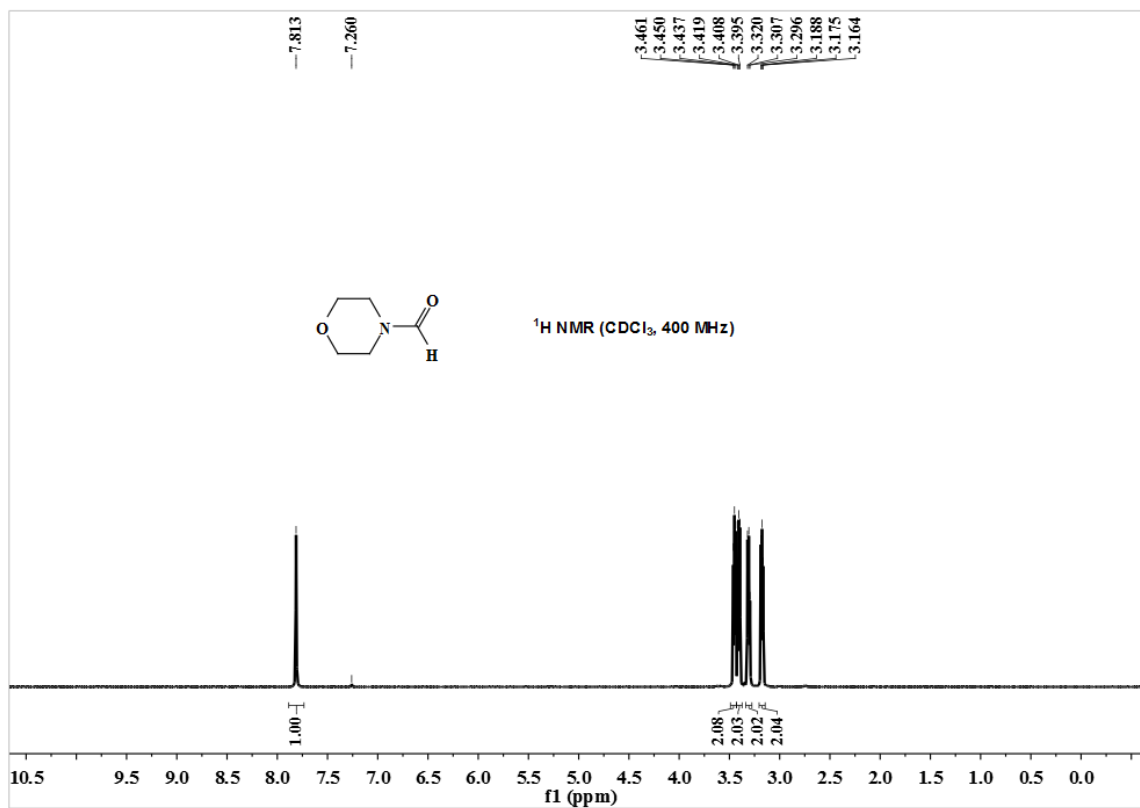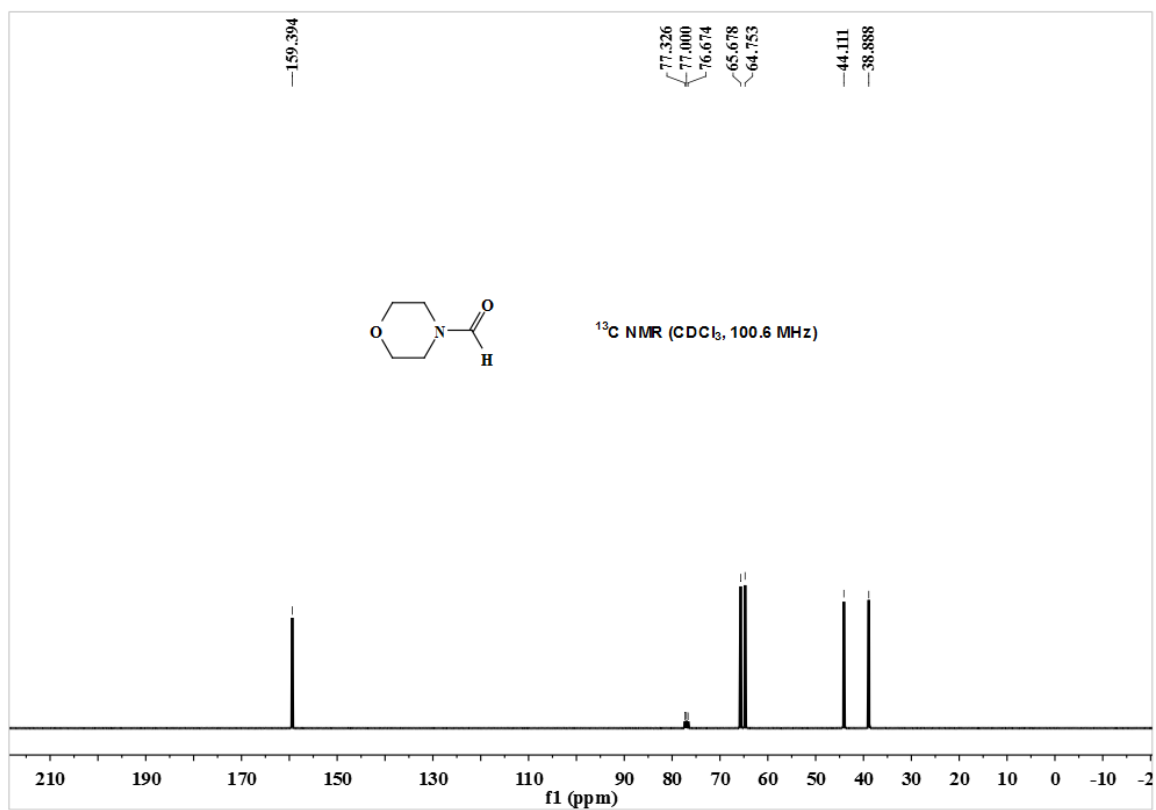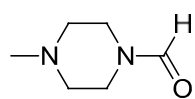

<sup>1</sup>H NMR (CDCl<sub>3</sub>, 400 MHz) δ 2.06 (s, 3H), 2.12 (t, <sup>3</sup>J = 5.2 Hz, 2H), 2.17 (t, <sup>3</sup>J = 5.2 Hz, 2H), 3.16 (t,



$^3J = 5.2$  Hz, 2H), 3.30 (t,  $^3J = 4.8$  Hz, 2H), 7.77 (s, 1H);

$^{13}\text{C}$  NMR ( $\text{CDCl}_3$ , 100.6 MHz)  $\delta$  38.05, 43.69, 44.50, 52.69, 53.89, 159.02.

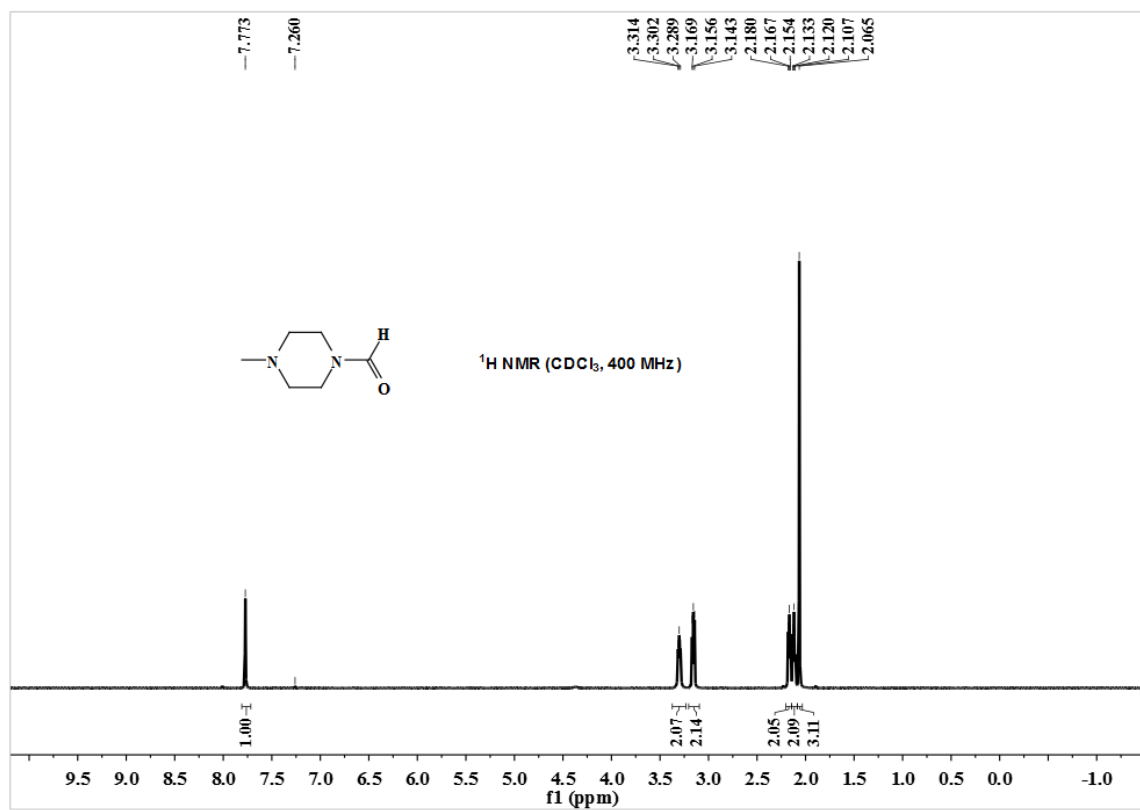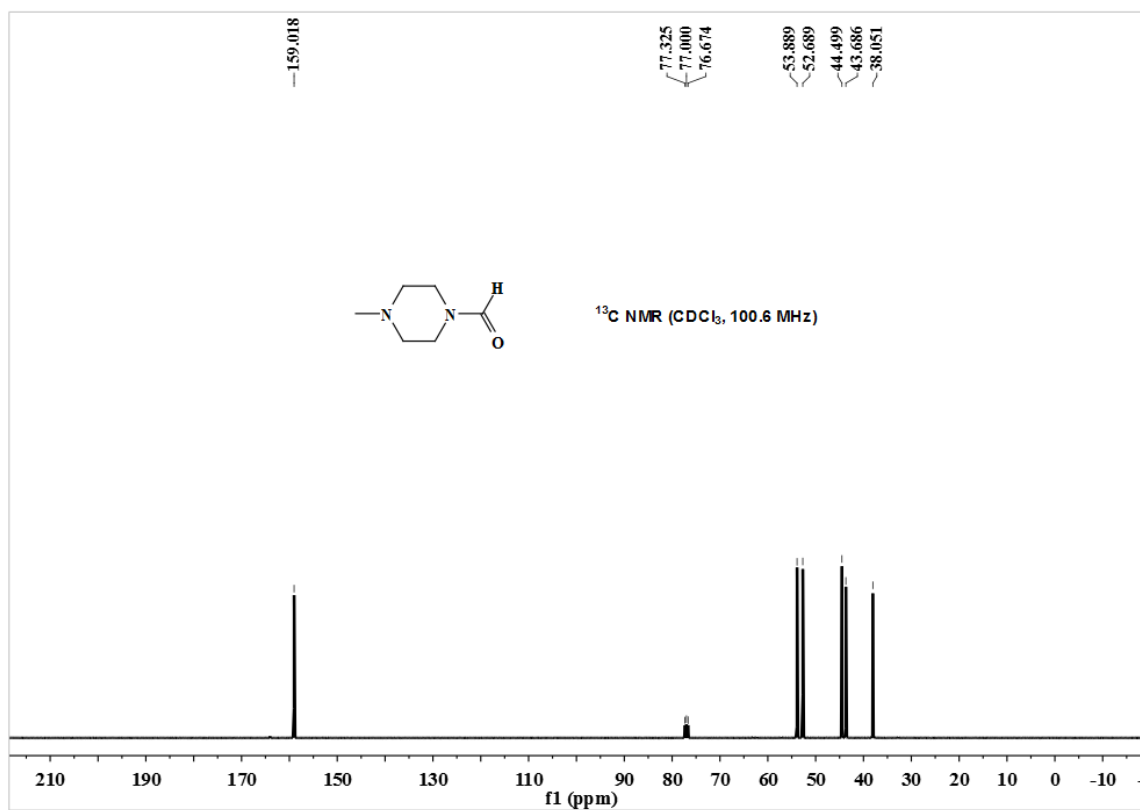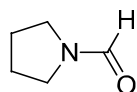

$^1\text{H}$  NMR ( $\text{CDCl}_3$ , 400 MHz)  $\delta$  1.65-1.70 (m, 4H), 3.16 (t,  $^3J = 6.4$  Hz, 2H), 3.27 (t,  $^3J = 6.4$  Hz, 2H), 8.01 (s, 1H);

$^{13}\text{C}$  NMR ( $\text{CDCl}_3$ , 100.6 MHz)  $\delta$  22.07, 22.77, 40.71, 43.58, 158.31.

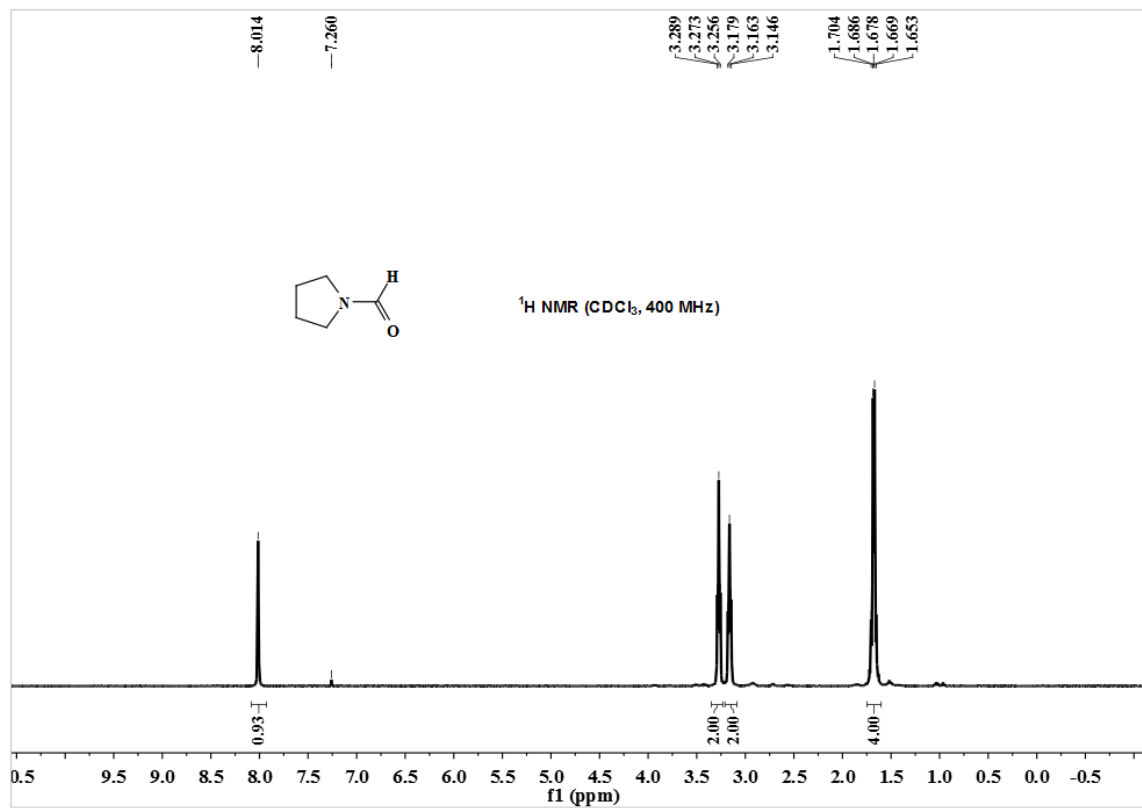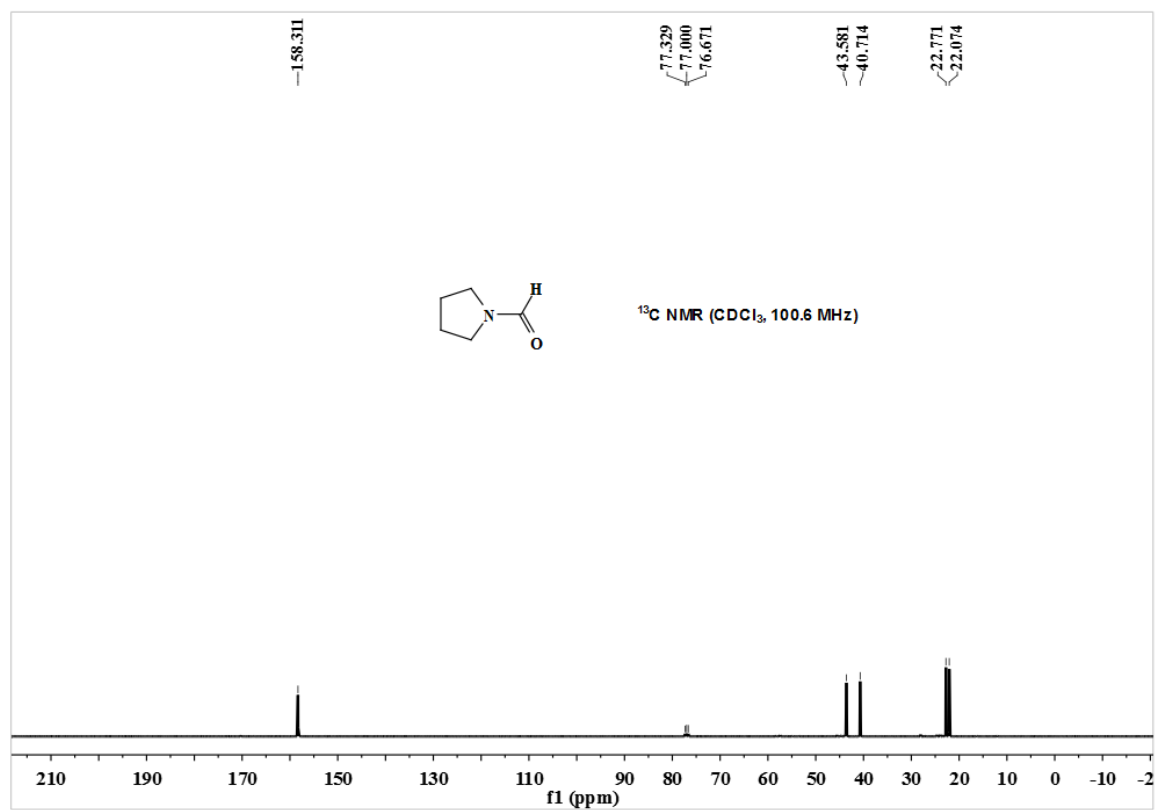

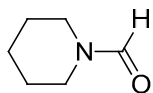

$^1\text{H}$  NMR ( $\text{CDCl}_3$ , 400 MHz)  $\delta$  1.36-1.47 (m, 4H), 1.52-1.57 (m, 2H), 3.17 (t,  $^3J = 5.6$  Hz, 2H), 3.33 (t,  $^3J = 5.6$  Hz, 2H), 7.86 (s, 1H);

$^{13}\text{C}$  NMR ( $\text{CDCl}_3$ , 100.6 MHz)  $\delta$  23.08, 23.60, 25.03, 38.67, 44.87, 158.94.

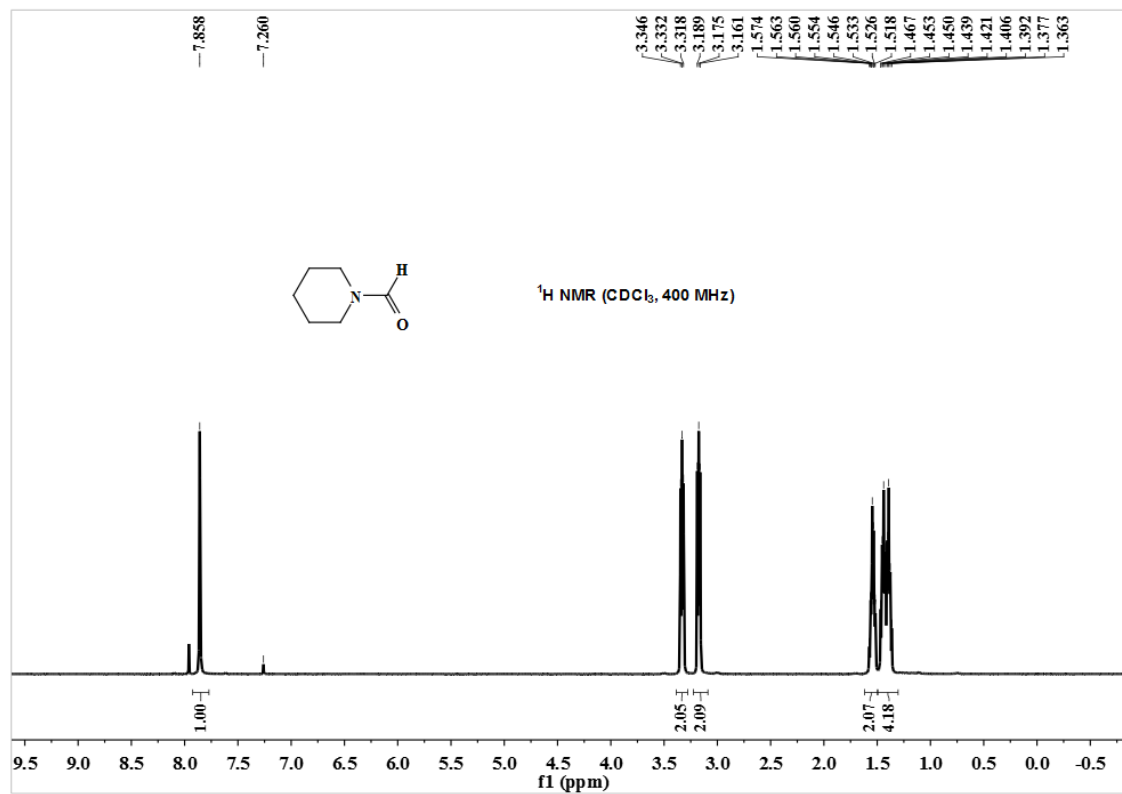

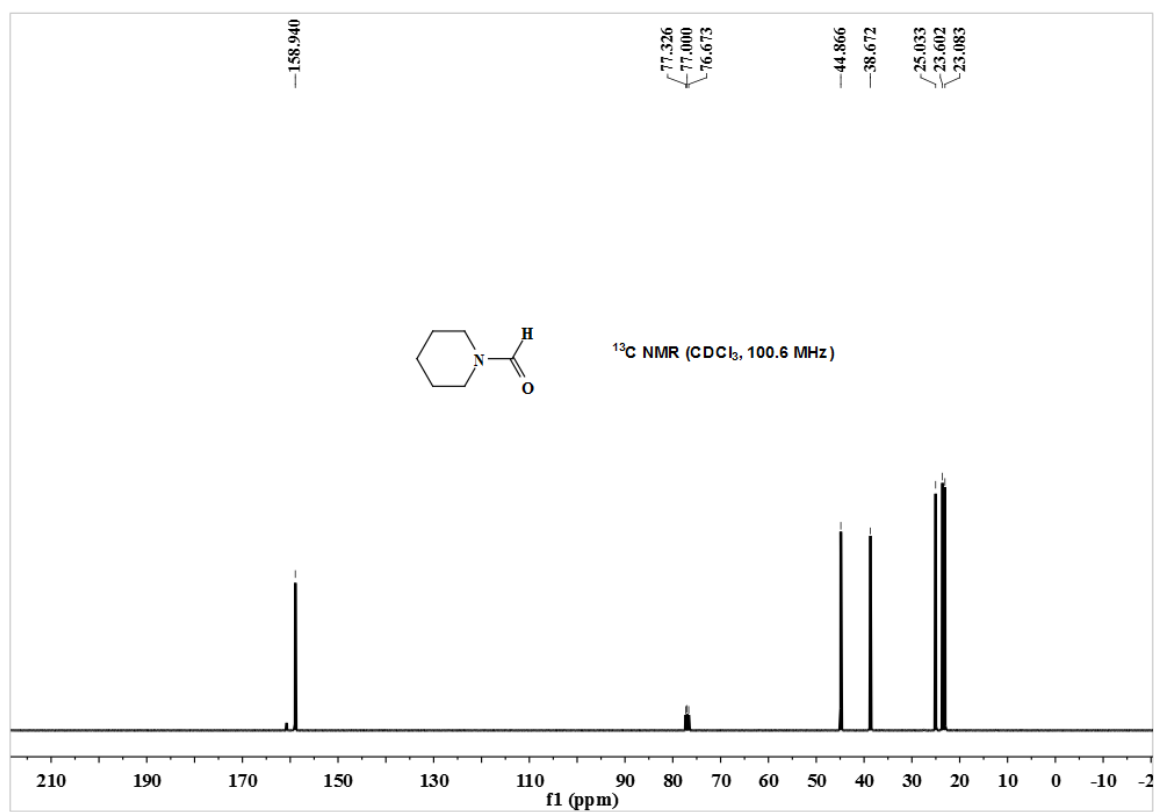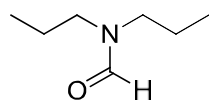

$^1\text{H}$  NMR ( $\text{CDCl}_3$ , 400 MHz)  $\delta$  0.70-0.74 (m, 6H), 1.33-1.44 (m, 4H), 3.00 (t,  $^3J = 6.8$  Hz, 2H), 3.07 (t,  $^3J = 7.6$  Hz, 2H), 7.87 (s, 1H);

$^{13}\text{C}$  NMR ( $\text{CDCl}_3$ , 100.6 MHz)  $\delta$  9.41, 9.85, 19.22, 20.50, 42.23, 47.55, 161.15.

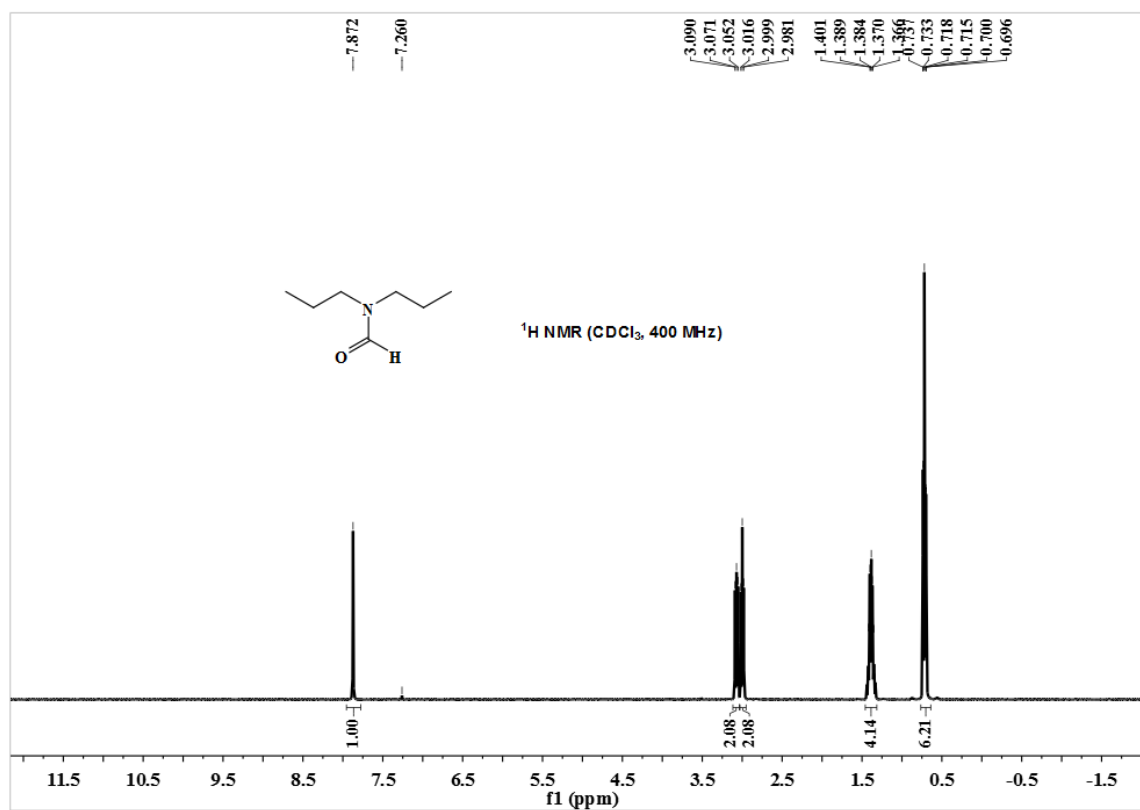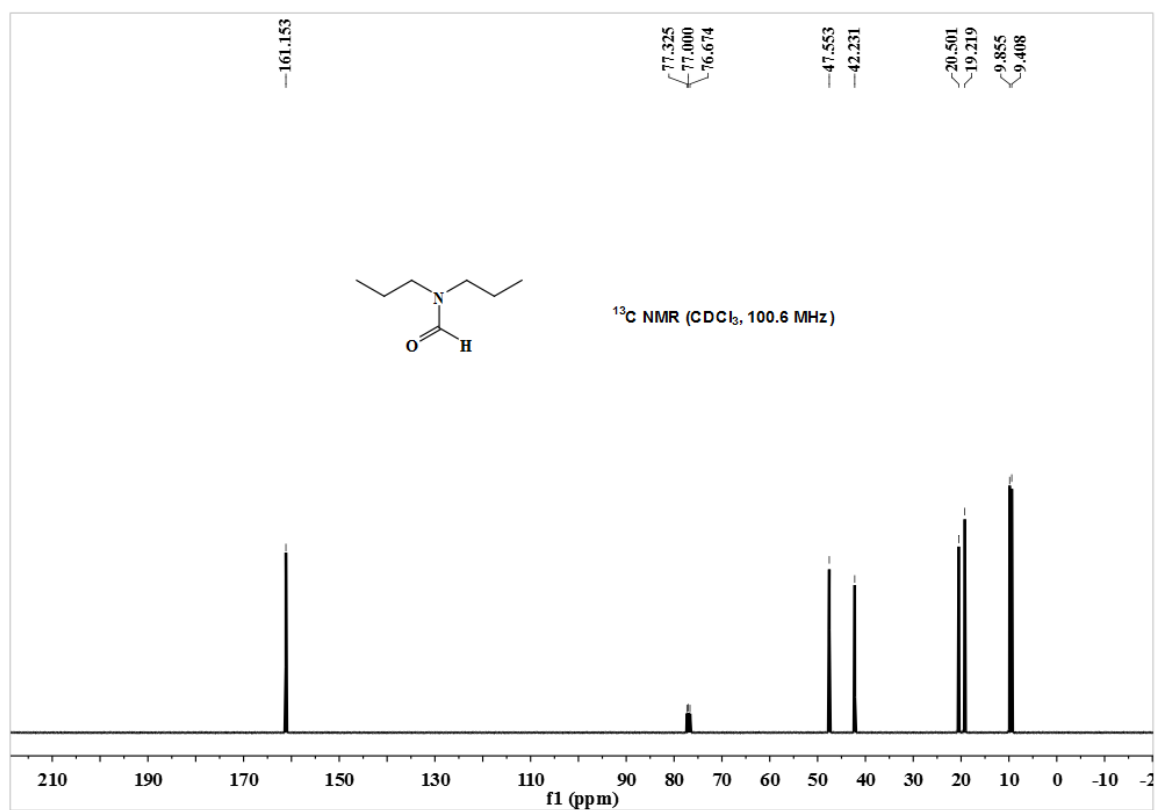

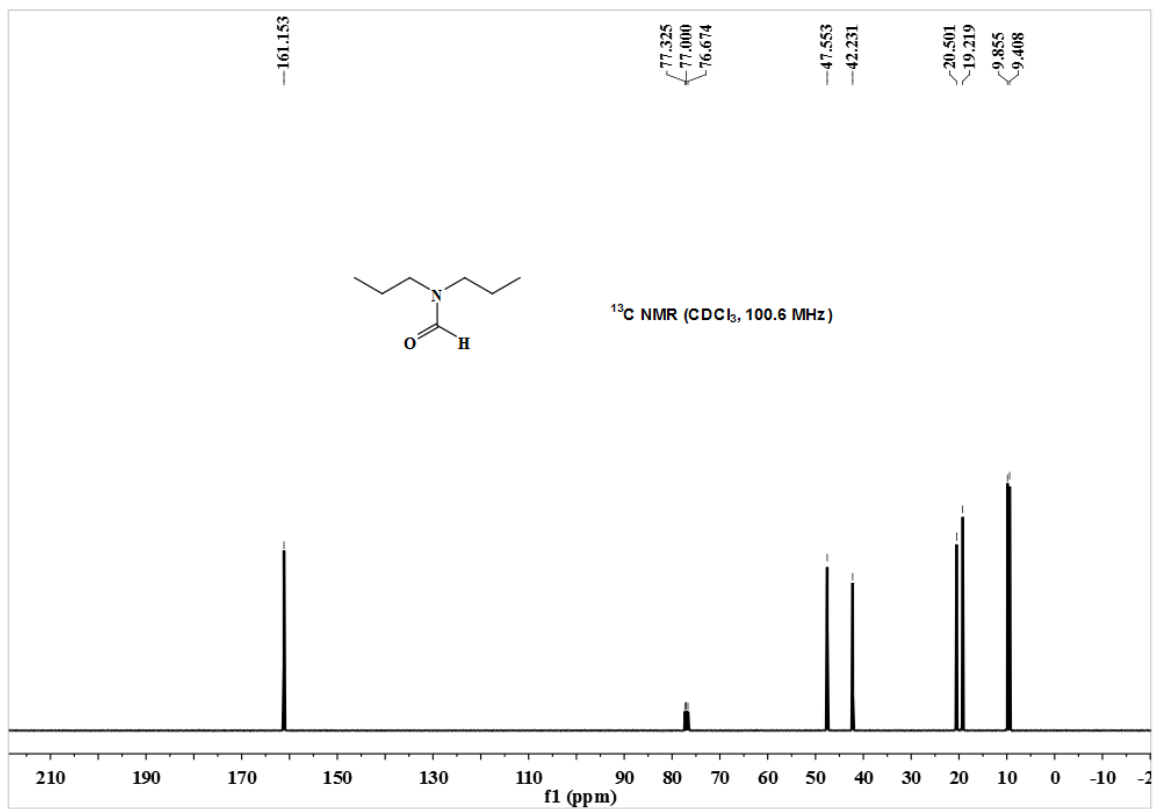

Supplement: c6nj03899a1.pdf [file c6nj03899a1.pdf]
